# Supplementary material for: Structural insights into ADP-ribosylation of ubiquitin by Deltex family E3 ubiquitin ligases
Source: PubMed Central journal article supplement — Sci Adv. 2020 Sep 18;6(38):eabc0418. doi: 10.1126/sciadv.abc0418 (PMC7500938; doi:10.1126/sciadv.abc0418), 2020-09-18
Supplement: abc0418_SM.pdf [file abc0418_SM.pdf]

[advances.sciencemag.org/cgi/content/full/6/38/eabc0418/DC1](https://advances.sciencemag.org/cgi/content/full/6/38/eabc0418/DC1)

## Supplementary Materials for

### **Structural insights into ADP-ribosylation of ubiquitin by Deltex family E3 ubiquitin ligases**

Chatrin Chatrin, Mads Gabrielsen, Lori Buetow, Mark A. Nakasone, Syed F. Ahmed, David Sumpton, Gary J. Sibbet, Brian O. Smith, Danny T. Huang\*

\*Corresponding author. Email: [d.huang@beatson.gla.ac.uk](mailto:d.huang@beatson.gla.ac.uk)

Published 18 September 2020, *Sci. Adv.* **6**, eabc0418 (2020)  
DOI: [10.1126/sciadv.abc0418](https://doi.org/10.1126/sciadv.abc0418)

#### **This PDF file includes:**

Figs. S1 to S9

## Supplementary Materials

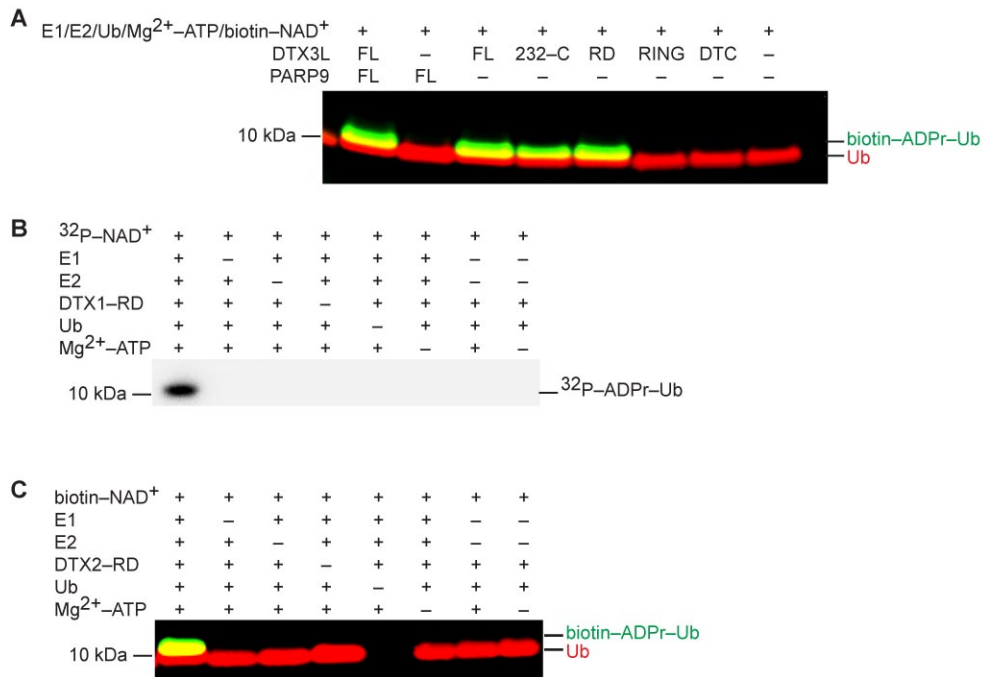

**Figure S1. RING-DTC domains of DTX1 and DTX2 catalyze ADP-ribosylation of Ub.**

(A) Western blot showing *in vitro* Ub ADP-ribosylation reactions with DTX3L and PARP9 variants in the presence of E1, E2 UbcH5B, Mg<sup>2+</sup>-ATP, Ub, and biotin-NAD<sup>+</sup>. (B) Reduced autoradiogram of ADP-ribosylation reactions with <sup>32</sup>P-NAD<sup>+</sup> in which E1, E2 UbcH5B, Ub, Mg<sup>2+</sup>-ATP or DTX1-RD was omitted as indicated. (C) Western blot from *in vitro* reactions with biotin-NAD<sup>+</sup> in which E1, E2 UbcH5B, Ub, Mg<sup>2+</sup>-ATP or DTX2-RD was omitted as indicated; α-Ub is in red and Neutravidin DyLight is in green. Samples were separated by SDS-PAGE in reducing conditions.

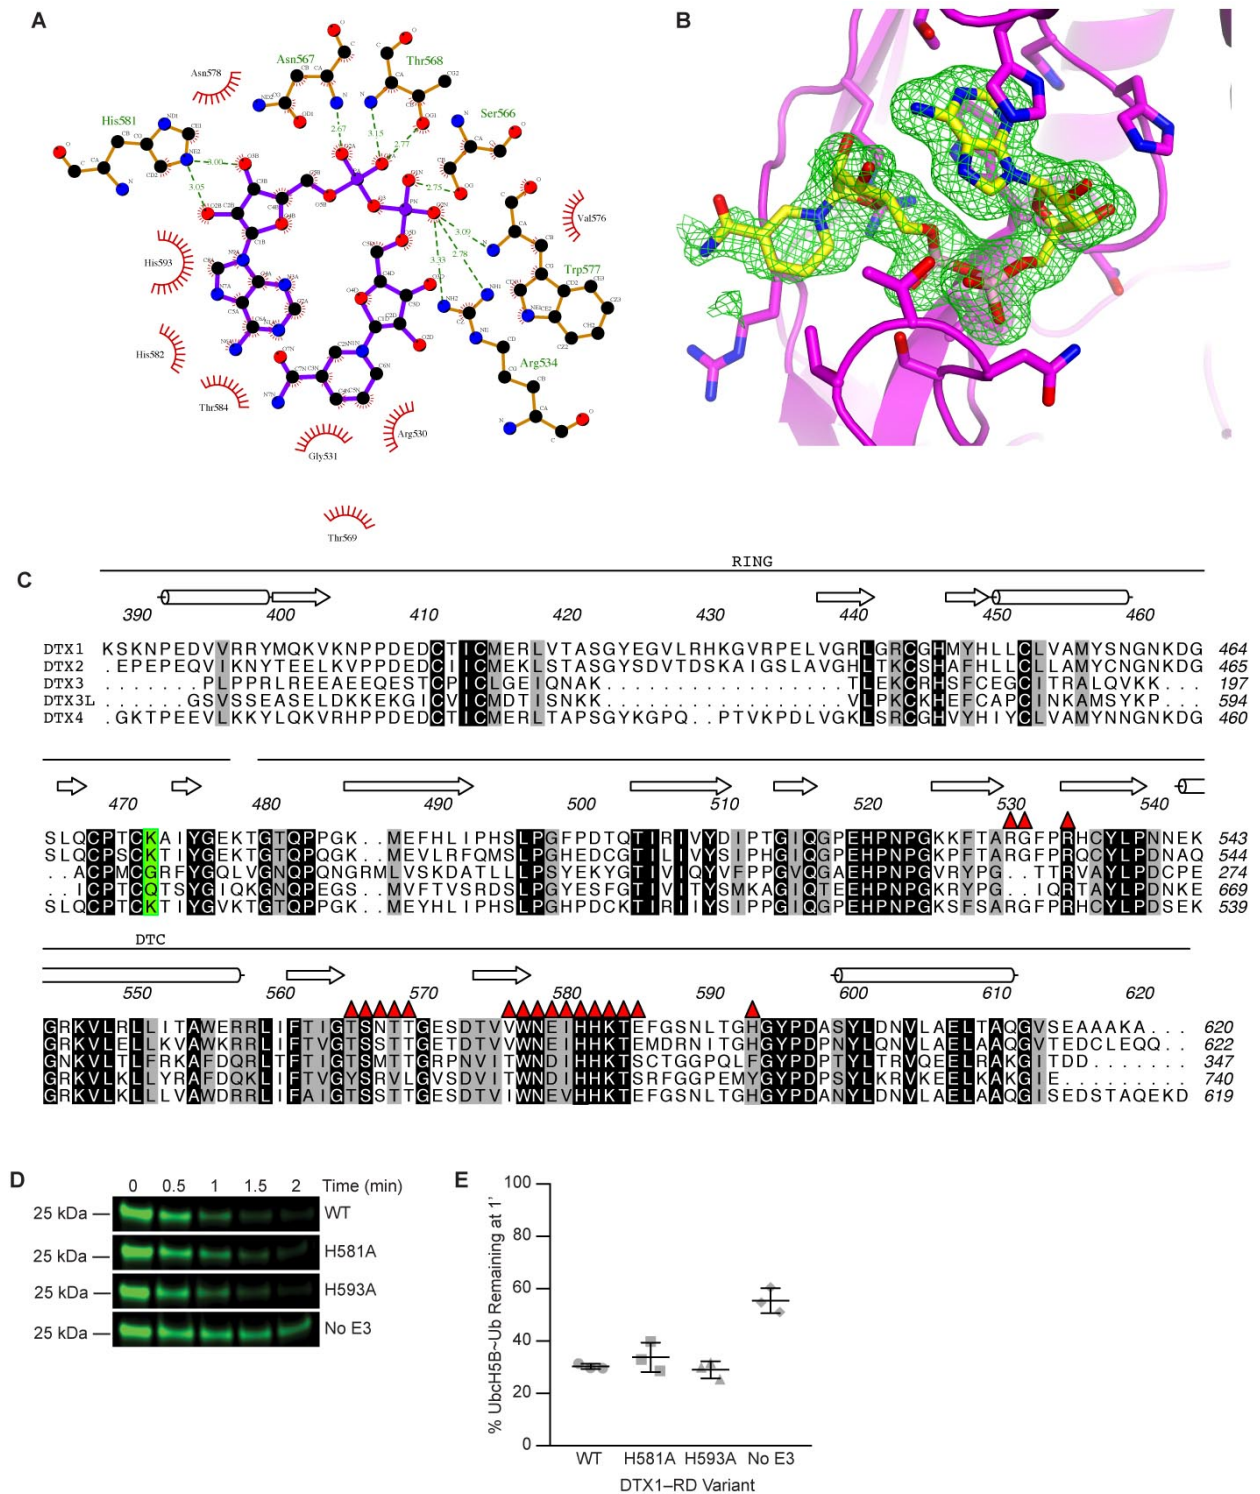

**Figure S2. ADP-ribosylation of Ub depends on binding of  $\text{NAD}^+$  to DTC domain.**

(A) Schematic diagram of interactions between  $\text{NAD}^+$  and chain A of DTX1-RD generated using LIGPLOT. Dotted green lines represent hydrogen bonds and distances are indicated. Lined red arcs depict residues contributing hydrophobic interactions. (B) Close-up of  $\text{NAD}^+$ -binding site in the DTX1-RD, colored and oriented as in Fig. 2C. An unbiased polder  $\text{Fo-Fc}$  map ( $2.5 \sigma$ ) is shown for  $\text{NAD}^+$ . (C) Sequence alignment of the C-terminal RING-DTC

domains from the five members of the Deltex family of E3s. Residues comprising the RING and DTC domains are indicated. Identical residues are highlighted in black and >60% conserved in grey. Surface residues comprising the conserved NAD<sup>+</sup>-binding pocket in the DTC domain are indicated by red triangles. The residue corresponding to the linchpin Arg in other E3s is highlighted in green. **(D)** Representative non-reduced SDS-PAGE gels following discharge of UbcH5B~F-Ub over time with DTX1-RD wild-type, H581A, or H593A, or no E3. **(E)** Quantification of single-turnover lysine discharge of UbcH5B~F-Ub with DTX1-RD wild-type (●, WT), H581A (■) or H593A (▲) or no E3 (◆). Data are presented as mean ± SD from three independent experiments (n=3).

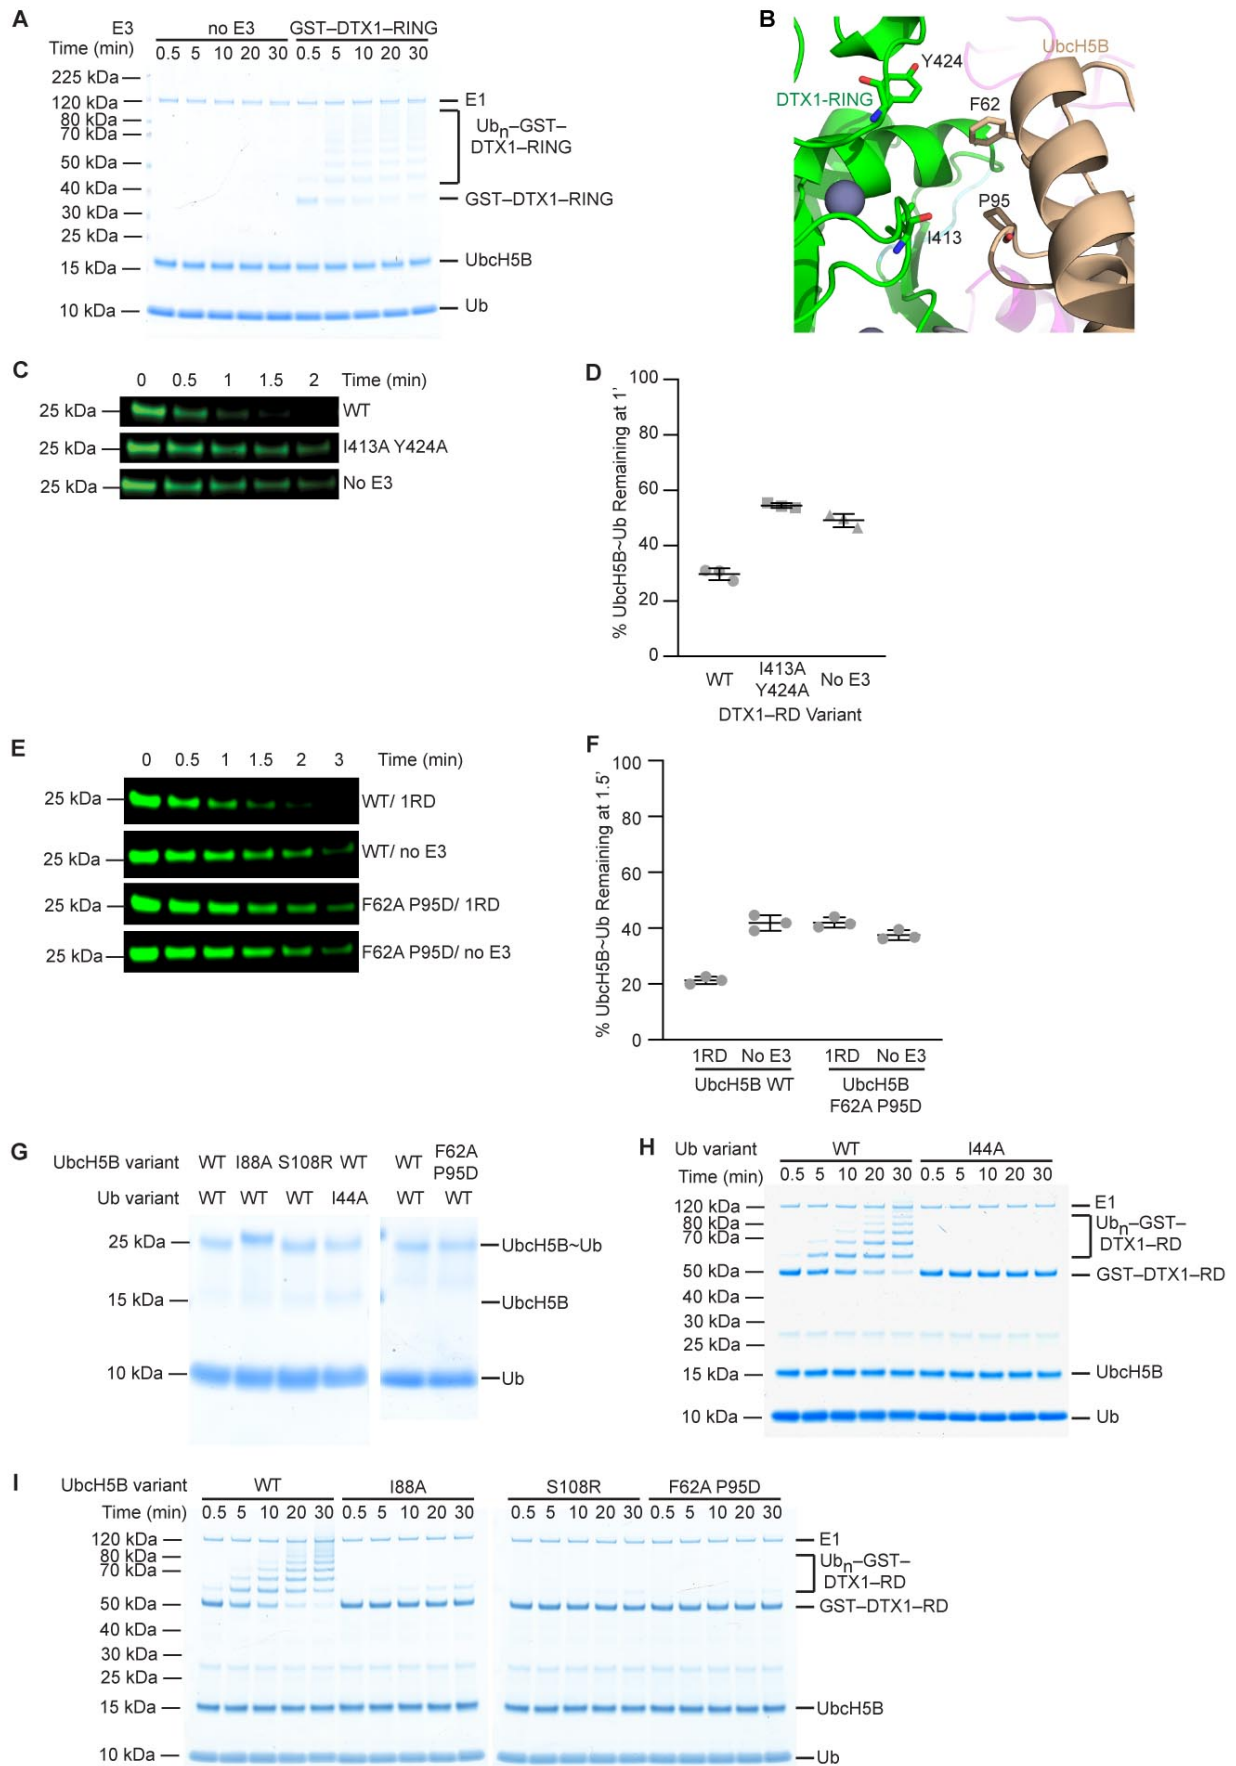

**Figure S3. Activity assays with DTX1, UbcH5B and Ub variants.**

(A) Reduced InstantBlue (Expedeon) stained SDS-PAGE gels following GST-DTX1-RING autoubiquitination over time. Ub<sub>n</sub>, ubiquitin of chain length n. (B) Predicted interactions between UbcH5B and the RING domain of DTX1 based on a model generated by aligning DTX1-RING with RNF38 bound to E2~Ub (PDB: 4V3L). UbcH5B is colored wheat. DTX1 and atoms are colored as in **Fig. 2** with C atoms colored according to the parent subunit. Key residues are shown as sticks. (C) Representative non-reduced SDS-PAGE gel following discharge of UbcH5B~F-Ub over time with DTX1-RD WT or I413A Y424A or no E3. (D) Quantification of single-turnover lysine discharge of UbcH5B~F-Ub with DTX1-RD WT (●) or I413A Y424A (■), or no E3 (▲). Data are presented as mean ± SD from three independent experiments (n=3). (E) Representative non-reduced SDS-PAGE gel following discharge of UbcH5B variants~Ub over time with DTX1-RD or no E3. (F) Quantification of single-turnover lysine discharge of UbcH5B variants~F-Ub with DTX1-RD or no E3. Data are presented as mean ± SD from three independent experiments (n=3). (G) Non-reduced InstantBlue (Expedeon) stained SDS-PAGE gel following the formation of UbcH5B~Ub using the indicated UbcH5B and Ub variants. (H) Reduced InstantBlue (Expedeon) stained SDS-PAGE gels from following GST-DTX1-RD autoubiquitination with Ub variants as indicated. Ub<sub>n</sub>, ubiquitin of chain length n. (I) Reduced InstantBlue (Expedeon) stained SDS-PAGE gels following GST-DTX1-RD autoubiquitination with UbcH5B variants as indicated. Ub<sub>n</sub>, ubiquitin of chain length n.

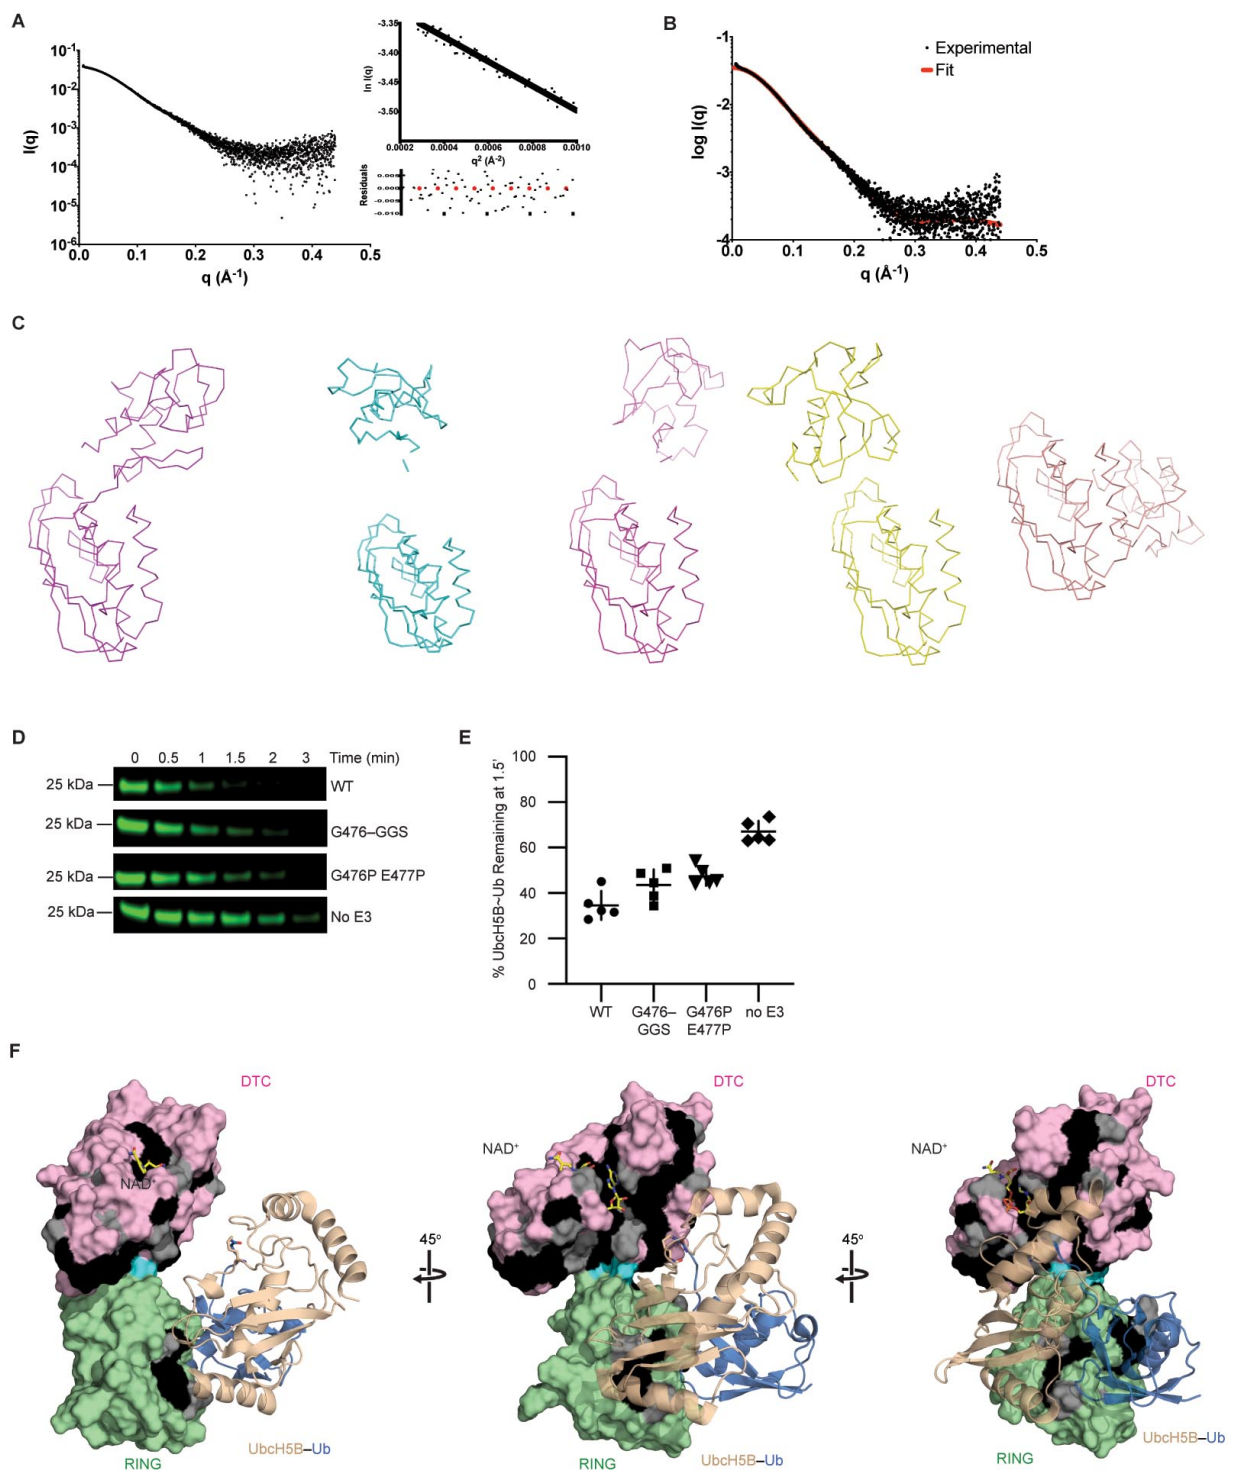

**Figure S4. RING and DTC domains are flexible relative to each other.**

(A) Experimental scattering curve. Inset Guinier region with residuals. (B) Experimental scattering curve with the best-fit output from Ensemble Optimization Method. (C) From left to right: Crystal structure of DTX1, followed by four of the highest scoring ensembles that fit the experimental data. Representative ensembles from both populations in **Fig. 4C** are shown. (D) Representative non-reduced SDS-PAGE gel following discharge of Ubch5B~F-

Ub over time with DTX1-RD WT or G476–GGG or G476P E477P or no E3. (E)

Quantification of single-turnover lysine discharge of UbcH5B~F-Ub with DTX1-RD WT (●) or G476–GGG (■), or G476P E477P (▲) or no E3 (◆). Data are presented as mean ± SD from five independent experiments (n=5). (F) Model of UbcH5B~Ub bound to DTX1-RD. UbcH5B~Ub complex is shown as a cartoon representation and colored as in **Fig. 4B**. DTX1-RD is shown in surface representation and colored as in **Fig. 2E**. Identical and conserved residues identified in fig. S2C are colored in black and red, respectively. The middle and right panels are rotated 45° and 90° about the y-axis, respectively, compared to the panel on the left.



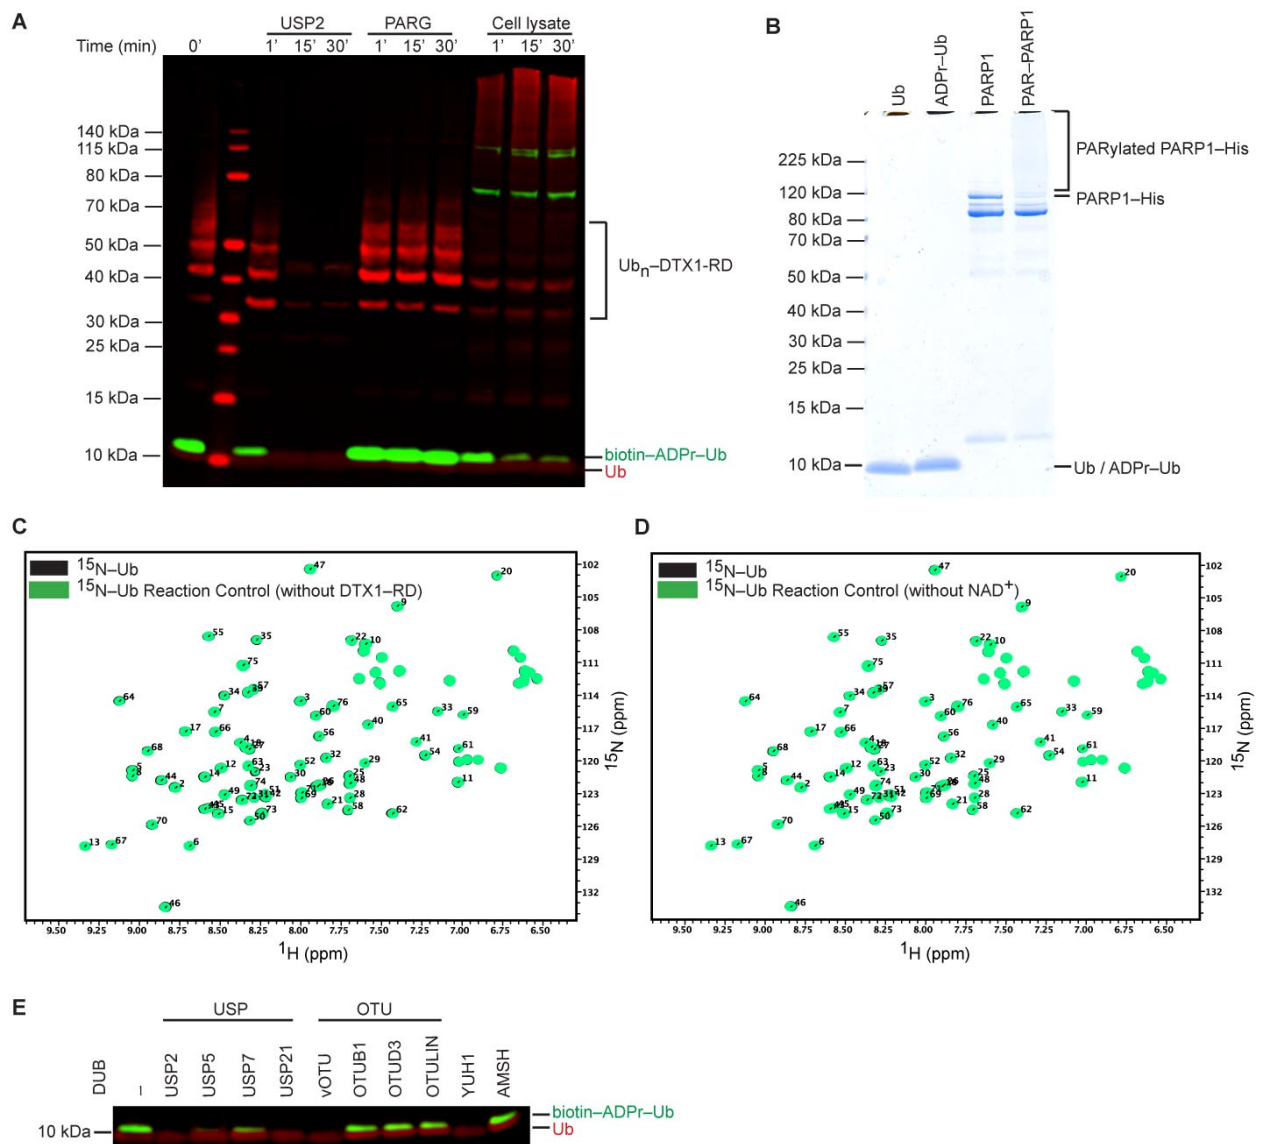

**Figure S5. ADP-ribose is attached to Gly76 of Ub by DTX1-RD and removed by Ub-linkage non-specific DUBS.**

(A) Western blot following *in vitro* hydrolysis of biotin-ADPr-Ub upon treatment with USP2, PARG, or cell lysate;  $\alpha$ -Ub is in red and Neutravidin DyLight is in green. (B) SDS-PAGE profile of Ub, ADPr-Ub, PARP1, and PARylated PARP1. (C)  $^1\text{H}$ - $^{15}\text{N}$  HSQC spectra of  $^{15}\text{N}$ -Ub (black) and  $^{15}\text{N}$ -Ub purified from control reaction without DTX1-RD (green). (D)  $^1\text{H}$ - $^{15}\text{N}$  HSQC spectra of  $^{15}\text{N}$ -Ub (black) and  $^{15}\text{N}$ -Ub purified from control reaction without  $\text{NAD}^+$  (green). (E) Western blot of *in vitro* reactions of biotin-ADPr-Ub treated with various DUBs;  $\alpha$ -Ub is in red and Neutravidin DyLight is in green.

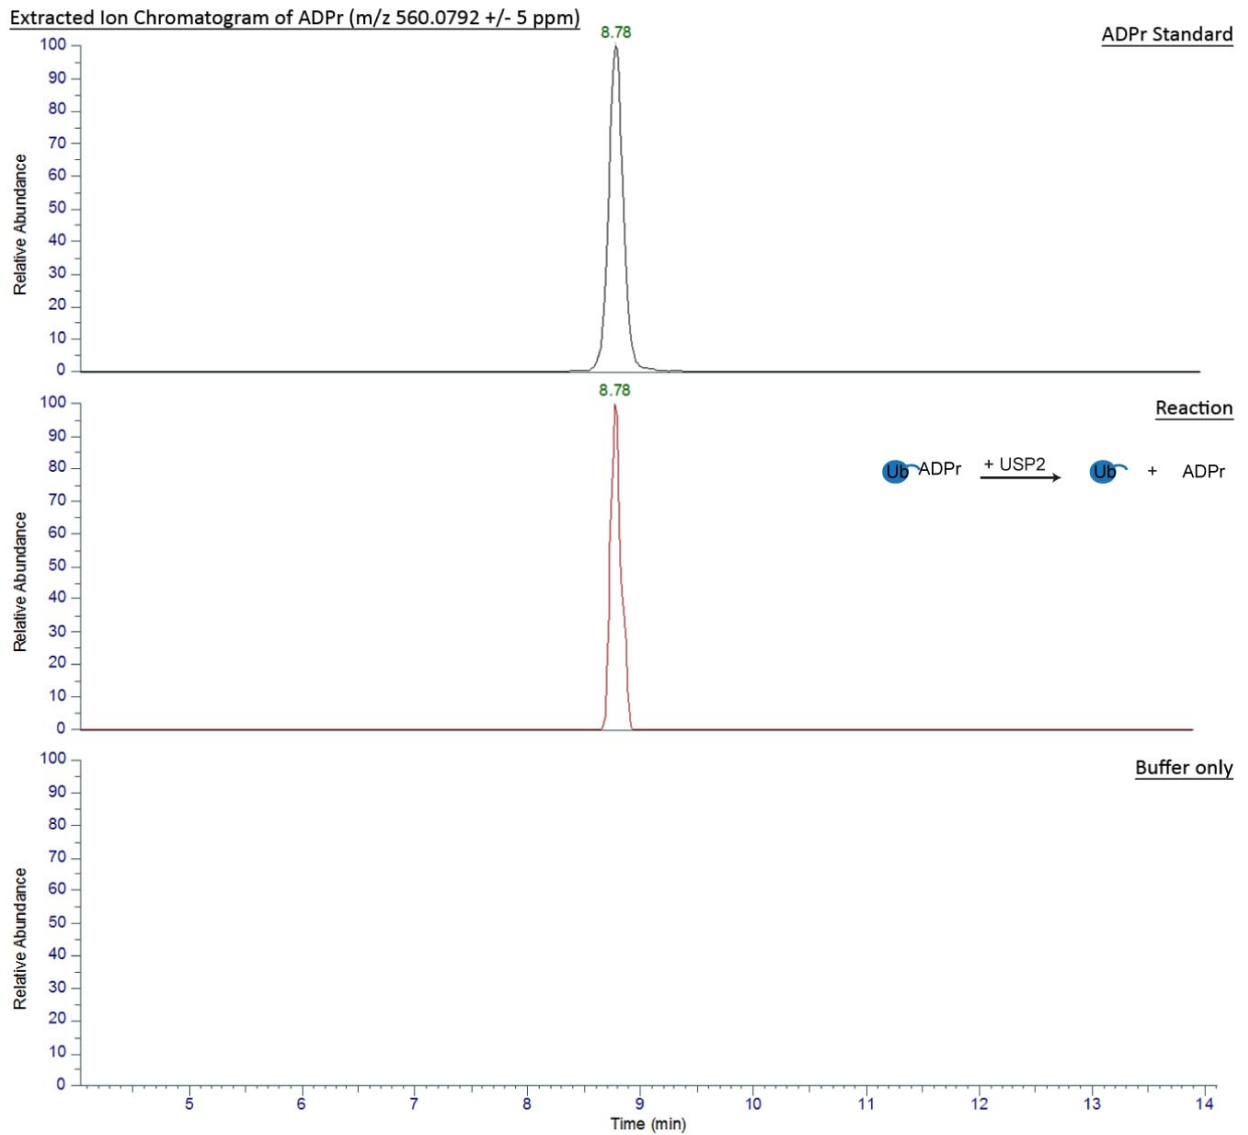

**Figure S6. Mass spectrometry analysis of ADPr-Ub treated with USP2.**

Extracted ion chromatogram of ADP ribose (m/z 560.0792 +/- 5ppm) for ADP ribose standard (top panel), ADPr-Ub treated with USP2 (middle panel), and reaction buffer only (bottom panel).

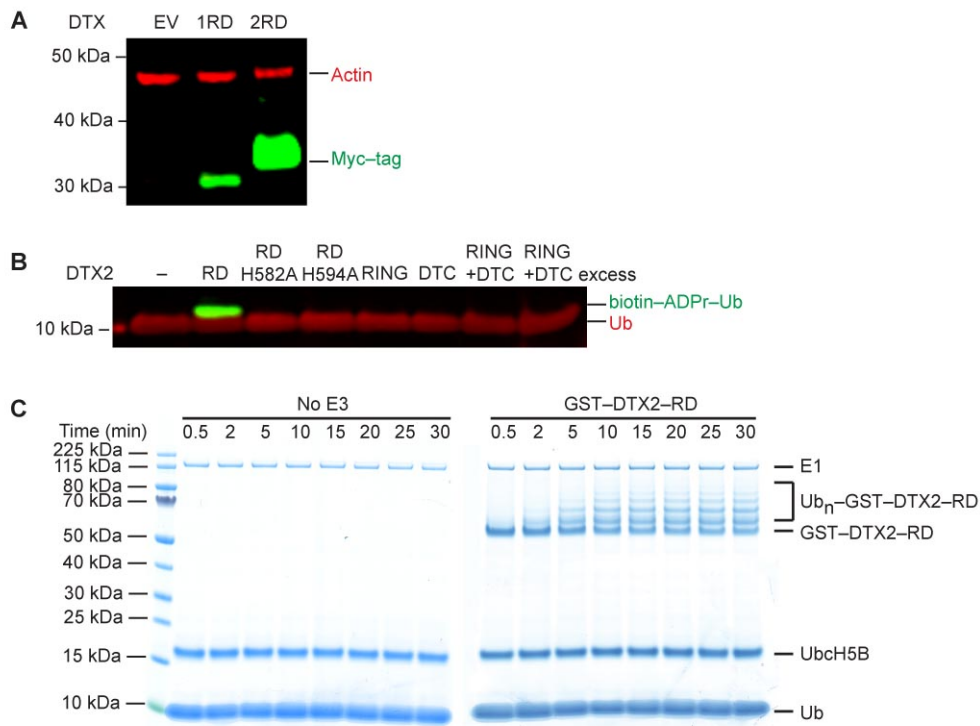

**Figure S7. DTX2-RD expression and activity.**

(A) Western blot of HEK293 whole cell lysate transfected with empty vector (EV), DTX1-RD (1RD), or DTX2-RD (2RD) with an N-terminal Myc tag. (B) Western blot from *in vitro* reactions with E1, Ubch5B, Ub,  $Mg^{2+}$ -ATP, biotin-labeled  $NAD^+$  and the indicated DTX2 variant, separated by SDS-PAGE in reducing conditions and visualized with an Odyssey CLx Imaging System;  $\alpha$ -Ub is in red and Neutravidin DyLight is in green. (C) Reduced InstantBlue (Expedeon) stained SDS-PAGE gels of GST-DTX2-RD autoubiquitination over time.  $Ub_n$ , ubiquitin of chain length n.

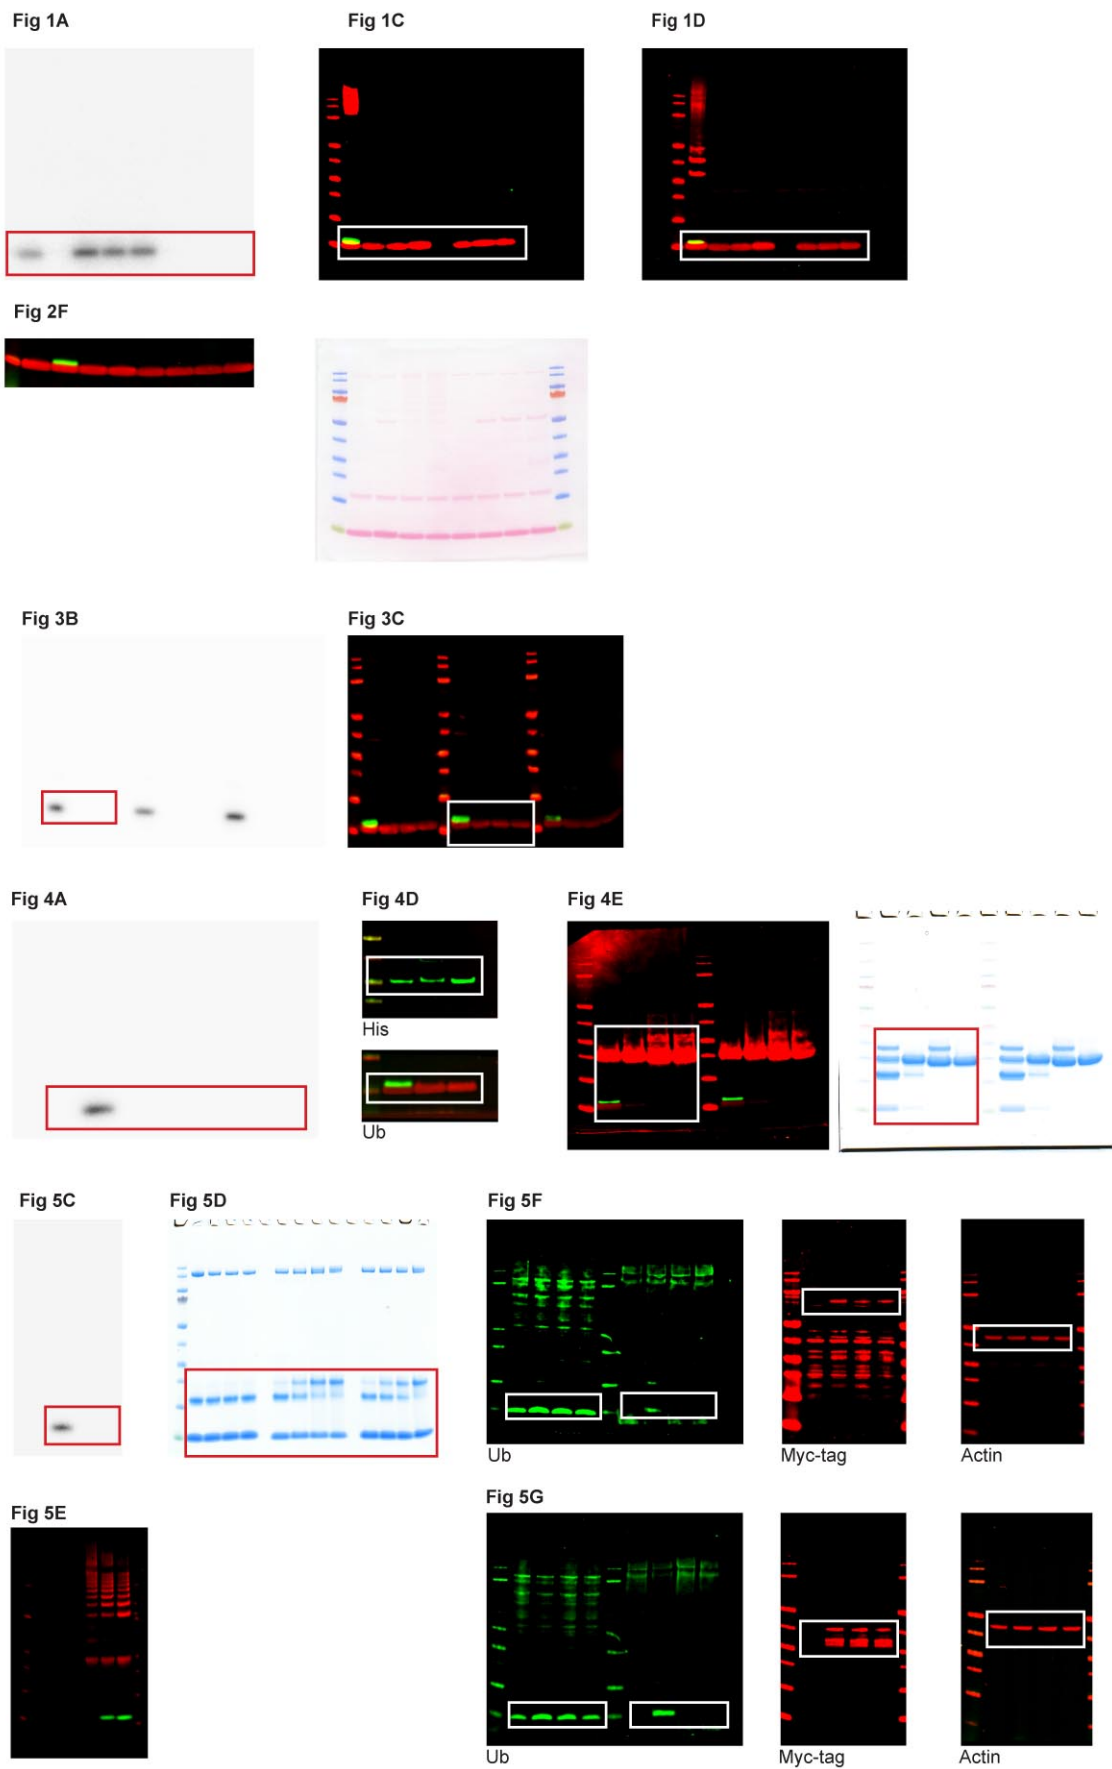

**Figure S8. Full gels or blots presented in the main figures**

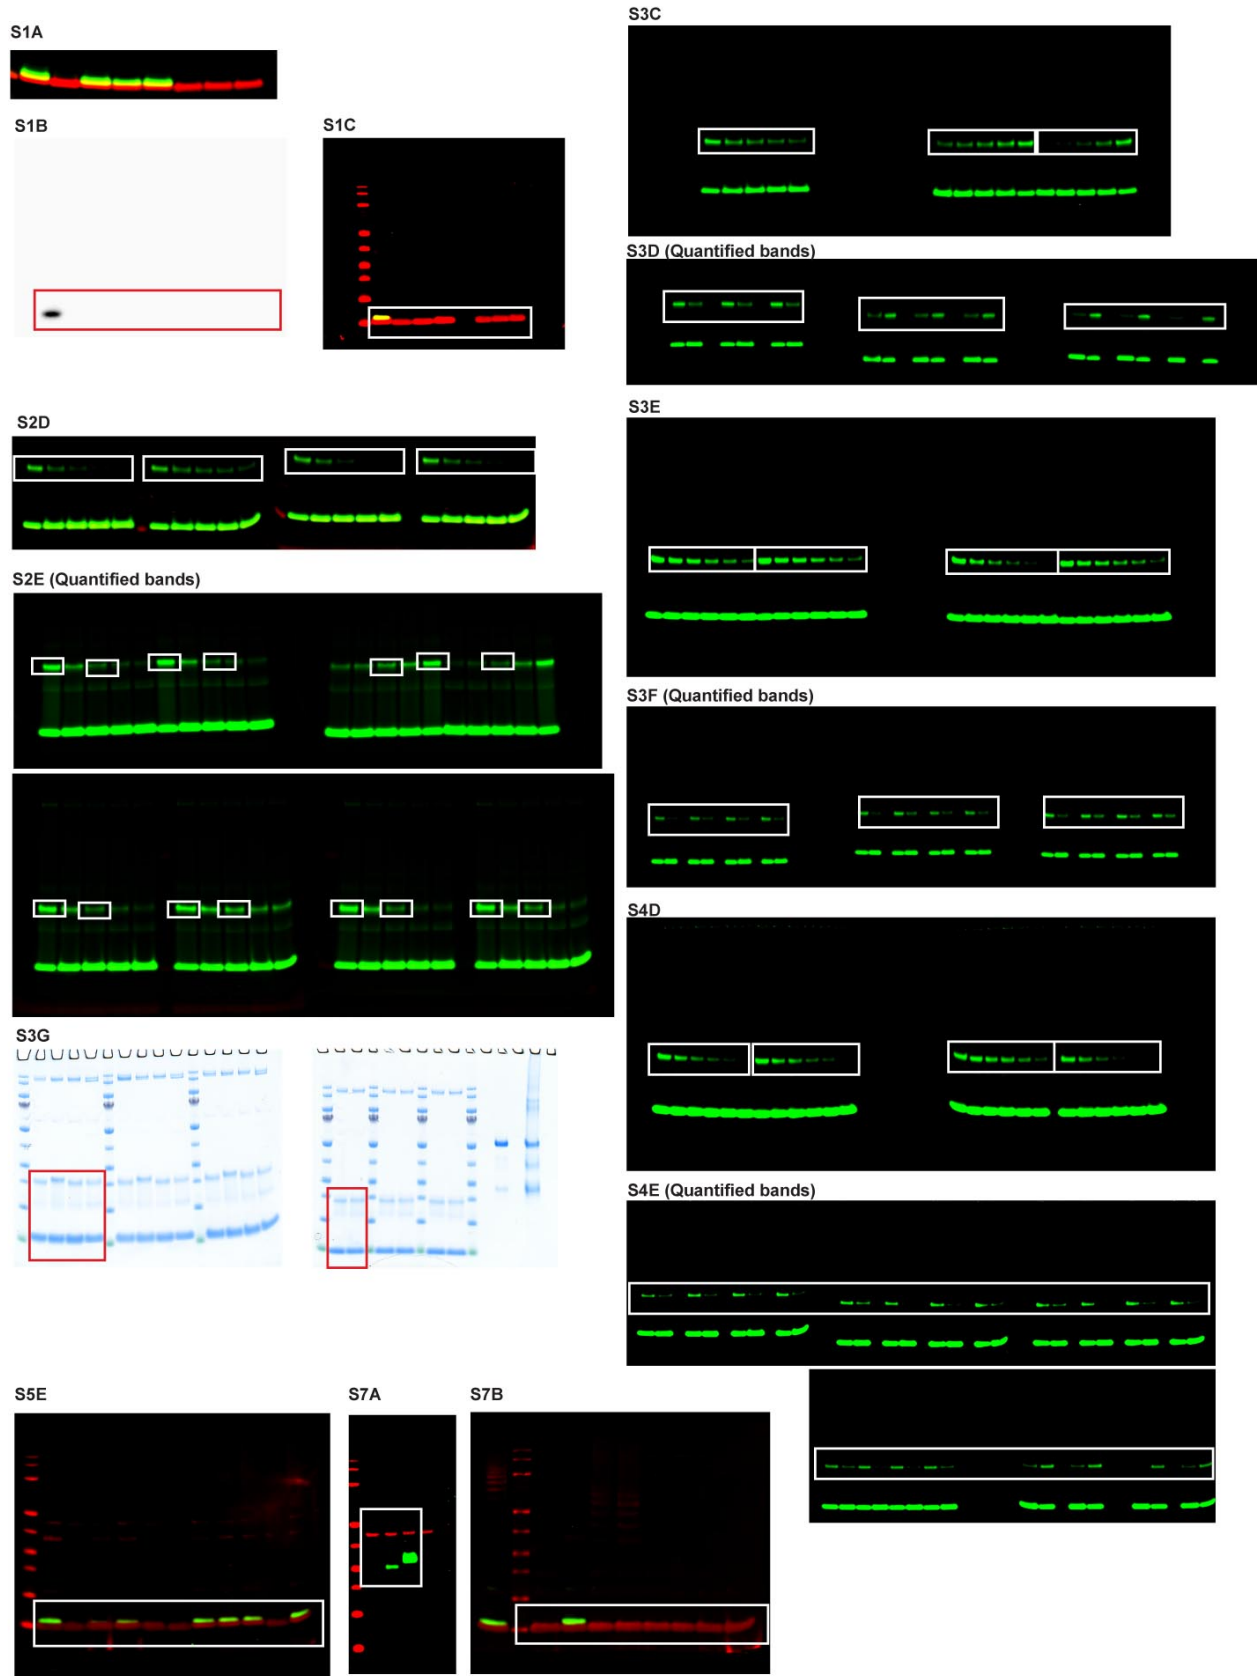

Figure S9. Full gels or blots presented in the supplementary figures
